# Supplementary material for: Continuous Flow Photocatalytic Hydrogen Production from Water Synergistically Activated by TiO2, Gold Nanoparticles, and Carbon Nanotubes
Source: MDPI journal article supplement (doi:10.3390/nano13071184), 2023-03-27
Supplement: s1 [file s1]

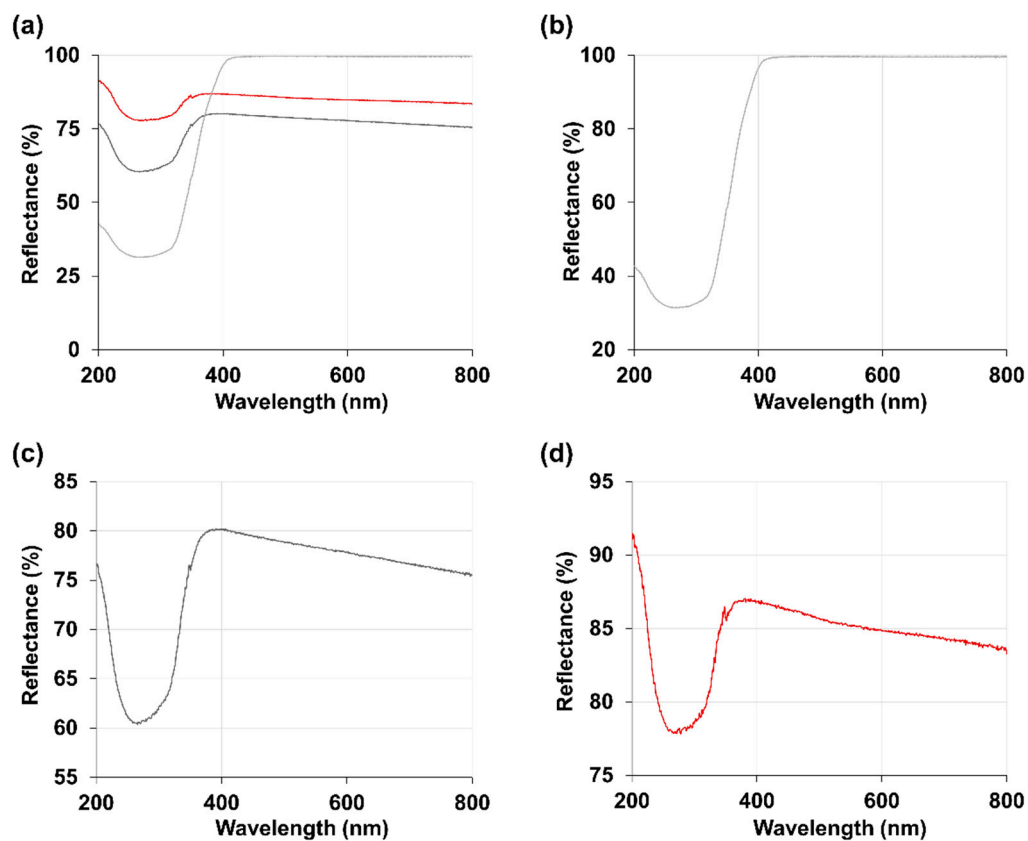

**Figure S1.** (a) Diffuse reflectance spectra of TiO<sub>2</sub> (grey curve), TiO<sub>2</sub>/CNT (dark grey curve), TiO<sub>2</sub>/AuCNT (red curve) and close-ups corresponding to (b) TiO<sub>2</sub>, (c) TiO<sub>2</sub>/CNT, and (d) TiO<sub>2</sub>/AuCNT. All powders were prepared as 1 wt% dispersions in BaSO<sub>4</sub> and spectra were corrected using the diffuse reflectance of pure BaSO<sub>4</sub> as reference.
